# Supplementary material for: Yamanaka Factors in the Budding Tunicate Botryllus schlosseri Show a Shared Spatio-Temporal Expression Pattern in Chordates
Source: Front Cell Dev Biol. 2022 Mar 7;10:782722. doi: 10.3389/fcell.2022.782722 (PMC8948423; doi:10.3389/fcell.2022.782722)
Supplement: Supplementary file 5 [file Table3.XLSX]

## Sheet: SoxB_Table3_supplem
Species	Sequence Name	Gene	Accession N° or annotation/re-annotation notes	Scaffold or chr of annotations/re-annotations	Sequence Source	Notes
Homo sapiens	Hs_Sox2	SoxB1	NP_003097		Protein db at NCBI
Mus musculus	Mm_Sox2	SoxB1	NP_035573		Protein db at NCBI
Gallus gallus	Gg_Sox2	SoxB1	NP_990519		Protein db at NCBI
Alligator mississippiensis	Am_Sox2	SoxB1	XP_006277242		Protein db at NCBI
Xenopus tropicalis	Xt_Sox2	SoxB1	NP_998869		Protein db at NCBI
Xenopus laevis	Xl_Sox2	SoxB1	NP_001081691		Protein db at NCBI
Callorhinchus milii	Cm_Sox2	SoxB1	XP_007905958		Protein db at NCBI
Danio rerio	Dr_Sox2	SoxB1	NP_998283		Protein db at NCBI
Salmo salar	Ss_Sox2	SoxB1	NP_001135190		Protein db at NCBI
Saccoglossus kowalevskii	Sk_SoxB1	SoxB1	NP_001158377		Protein db at NCBI
Strongylocentrotus purpuratus	Sp_SoxB1	SoxB1	NP_999639		Protein db at NCBI
Branchiostoma floridae	Bf_SoxB1	SoxB1	ABG66527		Protein db at NCBI
Branchiostoma belcheri	Bb_SoxB1	SoxB1	XP_019634859		Protein db at NCBI
Ciona robusta (= former Ciona intestinalis type A)	Cr_SoxB1	SoxB1	NP_001122330		Protein db at NCBI
Ciona savignyi	Cs_SoxB1	SoxB1	ENSCSAVP00000000866		Ensemble Csav 2.0
Phallusia mammillata	Pm_SoxB1	SoxB1	phmamm.CG.MTP2014.S272.g06489		Aniseed
Phallusia fumigata	Pf_SoxB1_p	SoxB1	Annotation due to track absence in Aniseed	S479	Aniseed
Molgula oculata	Mo_SoxB1	SoxB1	Moocul.CG.ELv1_2.S113631.g12969		Aniseed
Molgula occulta	Mocc_SoxB1_p	SoxB1	Annotation due to track absence in Aniseed	S465161	Aniseed
Molgula occidentalis	Mocci_SoxB1_p	SoxB1	Annotation due to track absence in Aniseed	S160756	Aniseed
Botryllus schlosseri	Bs_SoxB1_p	SoxB1	Reannotation due to the absence of a N-termin region evolutionary conserved	chr13: modification of Boschl.CG.Botznik2013.chr13.g61081	Aniseed	Confirmed by RT-PCR, cloning and sequencing. OL828249-50
Botrylloides leachii	Bl_SoxB1	SoxB1	Boleac.CG.SB_v3.S97.g15677		Aniseed
Halocynthia roretzi	Hr_SoxB1_p	SoxB1	Reannotation due to CDS anomalies	S474	Aniseed
Halocynthia aurantium	Ha_SoxB1_p	SoxB1	Annotation due to track absence in Aniseed	S587	Aniseed
Homo sapiens	Hs_Sox14	SoxB2	NP_004180		Protein db at NCBI
Mus musculus	Mm_Sox14	SoxB2	NP_035570		Protein db at NCBI
Alligator mississippiensis	Am_Sox14	SoxB2	XP_006272104		Protein db at NCBI
Gallus gallus	Gg_Sox14	SoxB2	NP_990092		Protein db at NCBI
Xenopus laevis	Xl_Sox14	SoxB2	NP_001165685		Protein db at NCBI
Xenopus tropicalis	Xt_Sox14	SoxB2	NP_001093703		Protein db at NCBI
Callorhinchus milii	Cm_Sox14	SoxB2	XP_007885307		Protein db at NCBI
Danio rerio	Dr_Sox14	SoxB2	NP_001032769		Protein db at NCBI
Salmo salar	Ss_Sox14	SoxB2	XP_013979136		Protein db at NCBI
Saccoglossus kowalevskii	Sk_SoxB2	SoxB2	NP_001158461		Protein db at NCBI
Strongylocentrotus purpuratus	Sp_SoxB2	SoxB2	AAD40687		NCBI
Branchiostoma floridae	Bf_SoxB2	SoxB2	XP_002593017		Protein db at NCBI
Branchiostoma belcheri	Bb_SoxB2	SoxB2	ACI15224		NCBI
Ciona robusta (= former Ciona intestinalis type A)	Cr_SoxB2	SoxB2	NP_001122329		Protein db at NCBI
Ciona savignyi	Cs_SoxB2	SoxB2	ENSCSAVP00000015448		Ensemble Csav 2.0
Phallusia mammillata	Pm_SoxB2	SoxB2	phmamm.CG.MTP2014.S52.g01936		Aniseed
Phallusia fumigata	Pf_SoxB2_p	SoxB2	Reannotation due to contig anomalies	S18645 + S29185	Aniseed
Molgula oculata	Mo_SoxB2	SoxB2	Moocul.CG.ELv1_2.S65129.g04213		Aniseed
Molgula occulta	Mocc_SoxB2_p	SoxB2	Annotation due to track absence in Aniseed	S168395	Aniseed
Molgula occidentalis	Mocci_SoxB2_p	SoxB2	Annotation due to track absence in Aniseed	S540974	Aniseed
Botryllus schlosseri	Bs_SoxB2_p	SoxB2	Reannotation to to CDS incompleteness and contig anomalies	chrUn	Aniseed	modification of the Aniseed prediction Boschl.CG.Botznik2013.chrUn.g33885
Botrylloides leachii	Bl_SoxB2	SoxB2	Boleac.CG.SB_v3.S513.g11013.01.t		Aniseed
Halocynthia roretzi	Hr_SoxB2	SoxB2	Harore.CG.MTP2014.S444.g13393.01.t		Aniseed
Halocynthia aurantium	Ha_SoxB2_p	SoxB2	Reannotation due to contig anomalies	S10489 + S6151	Aniseed
